# Supplementary material
Source: PubMed Central journal article supplement (PMC4086248)
Supplement: NIHMS531752-supplement-Supplementary_Data.pdf [file NIHMS531752-supplement-Supplementary_Data.pdf]

Online supporting material for: “On the genetic control and origin of apomixis in *Boechera*”.

Contents:

Supplementary Materials and Methods

Table S1: Statistical summaries and primer sequences of the SSR loci

Table S2: Description of the sampling sites

Table S3: Allele calls for 10SSR loci, 231 individuals

*Methods Summary*

*Sample collection:* Seeds from single were collected from various *Boechera* species sampled from throughout North America (Table S1; See Fig. 1 in Sharbel et al. (2005)). Species identification was conducted using the new *Boechera* nomenclature and descriptions (Al-Shehbaz 2003). In addition, collections were compared to known herbarium specimens. Five to 10 seeds from each collection site were placed on moist filter paper in petri plates, and vernalized at 5°C for 2 to 3 weeks. Upon germination, 3 to 5 seedlings were transferred to pots (11 x 11 x 13 cm) containing sterilized soil and grown in a controlled environmental growth room. Plants were grown in a 12 hour light/dark cycle under fluorescent lighting (cool white and GrowLux©), with a daily temperature variation from 22° to 28°C.

Ploidy analyses of somatic and seed tissues: Ploidy levels of somatic tissue were measured using flow cytometry. Using the updated taxon names presented here, the genome size criteria of Sharbel et al. (2005) was used to group samples into 2x (diploid) and 3x (triploid) ranges. One morphological retrofracta-stricta hybrid gave a signature of apomixis near the diploid range. This line was removed from the analysis as it may contain an aneuploid chromosome or may simply be a diploid hybrid.

In order to determine the reproductive mode of each plant, the flow cytometric seed screen analysis was performed on from 1 to 3 bulked samples (5 seeds per bulk) per individual using a PARTEC PA-I flow cytometer and their CyStain® UV Precise P staining kit. The FCSS analysis was performed on a subset of the individuals used in the genetic analyses, since seeds were not available for all accessions. Plants which showed flow cytometry profiles in which all seeds had a diploid embryo and triploid endosperm were labelled as sexual, while plants showing any deviation from this 2:3 ratio were recorded as being apomictic.

*Microsatellite analysis:* DNA was isolated from the leaf tissue of 231 individuals using a Nucleon (Amersham Pharmacia Biotech Europe GmbH) extraction kit. All individuals were genotyped at 10 SSR markers (table S2). A separate 96 well plate amplification (10 µl per reaction) for each microsatellite locus was performed using the protocol outlined by Clauss et al. (2002). An ABI 3700 genetic analyzer was used for the fragment analysis. For most runs the PCR products of 3 microsatellites (with different labels) were mixed with an internal size standard (ROX-500) and analyzed in a single run. The three labels used in this study differed in fluorescence intensity, and thus to correct for signal intensity each ABI 3700 genetic analyzer run was mixed as follows: (0.5 µl FAM-product) + (1.2 µl NED-product) + (1.2 µl HEX-product) + 7 µl loading mixture (see ABI documentation for loading mixture). A multi step process was used to score microsatellite genotypes. First, the internal size standards of all individual runs were aligned (and occasionally corrected) using the ABI GeneScan (3.x) software.

The internally-aligned samples were then imported into the ABI Genotyper (3.5) software, where locus amplification was assessed in addition to a qualitative verification of peak morphology. Fragment (i.e. allele) size and peak height (i.e. PCR product dosage) were subsequently identified for each locus using the Genotyper software, followed by manual verification of each call in order to insure proper peak designation. The checked data were then exported into SPSS for Windows (release 11.5.0, SPSS Inc.), where fragment size distributions were generated using the complete data set for each locus. This final statistical step (i.e. binning) enables fragments which differ slightly in size (a result of genetic analyzer error) to be assigned to specific distribution groups, each of which represents a particular allele. All samples were processed and analyzed blindly, and in random order.

*Statistical Analysis:* All population genetic analyses were conducted in GENODIVE; this program allow for the simultaneous analysis of different ploidy. Heterozygosity and genetic distance data was output into JMP Genomics 5.1 (SAS Institute, Cary, NC, USA). Ploidy and mating system were analyzed in a fixed-effect ANOVA, where a new variable of the ploidy-sexuality combination (2xSex, 2xApo, 3xApo) was the factor. Specific contrasts were made between groups using customized F-test contrasts. Simulated data distributions were compared to the real data by two-sample t-tests.



Table S1: Summary data for the 10 SSR loci used in this study.

| Accession | Gene diversity | h <sub>e</sub> | F <sub>st</sub> | K <sub>st</sub> | Chr. | Dye                     | Primer 1 Sequence (5' to 3') | Primer 2 Sequence (5' to 3') |
|-----------|----------------|----------------|-----------------|-----------------|------|-------------------------|------------------------------|------------------------------|
| 1         | 0.804          | 0.501          | 0.591           | III             | NFD  | ATCTCCGTTTGGCAT         | TTTCAATCTCTCTGGCTCA          |                              |
| 2         | 0.224          | 0.022          | 0.029           | III             | HEX  | GGGCTGCTATCATGTC        | CCGCTGCATATCCAGACA           |                              |
| 3         | 0.86           | 0.165          | 0.001           | V               | FAM  | GACTAATCATCCAGCTACGCCAC | ATTCTCTCACTTCTTGATCCG        |                              |
| 4         | 0.108          | 0.218          | 0.121           | V               | NFD  | CAGGAGGATTCGGATGTCG     | AGCGATTGACAGGCCCTAAG         |                              |
| 5         | 0.418          | 0.605          | 0.485           | V               | HEX  | GTGGTACCGACTGGCTCTG     | TCAGCTTGACCATTTCCAG          |                              |
| 6         | 0.773          | 0.166          | 0.159           | III             | FAM  | CACCACTGCTTCGGTACTT     | TGCTCACTTCTCTCTGGTTTG        |                              |
| 7         | 0.389          | 0.275          | 0.208           | I               | NFD  | CGACGAGGATGATATTCG      | CGGAGATGATAATCGGTG           |                              |
| 8         | 0.751          | 0.371          | 0.371           | II              | HEX  | CGATGCTCTTTCGAGGTT      | TACTTCACTCTTTCGAGCA          |                              |
| 9         | 0.671          | 0.114          | 0.086           | III             | FAM  | CGATGCTTCGGTACTT        | TGCTCACTTCTCTCTGGTTTG        |                              |
| 10        | 0.576          | 0.487          | 0.073           | I               | HEX  | TTTCGAGGTTTACGACCGATCTG | GTTCATCCGACTTGATTAAC         |                              |

1-Taken from Clausen et al (2002)  
 2-Gene diversity corrected for sample size [Nai], 1978)  
 3- Arabidopsis thaliana chromosome location of microsatellite from <http://arabidopsis.org/home.html>

Table S2: Sampling location, ploidy and sexuality of all lines analyzed.

| ID  | Ploidy | Species                 | reprol | pop# | lat   | long    |
|-----|--------|-------------------------|--------|------|-------|---------|
| 45  | 3      | stricta X polyantha     | apo    | 1    | 45.37 | -116.48 |
| 463 | 3      | stricta X polyantha     | apo    | 1    | 45.37 | -116.48 |
| 476 | 3      | stricta X polyantha     | apo    | 1    | 45.37 | -116.48 |
| 495 | 2      | stricta                 | apo    | 3    | 44.43 | -112.62 |
| 465 | 2      | stricta                 | apo    | 3    | 44.43 | -112.62 |
| 474 | 2      | stricta                 | apo    | 3    | 44.43 | -112.62 |
| 484 | 2      | stricta                 | apo    | 3    | 44.43 | -112.62 |
| 216 | 2      | polyantha               | apo    | 4    | 47.45 | -110.58 |
| 195 | 2      | retrofracta             | sex    | 4    | 47.45 | -110.58 |
| 23  | 3      | retrofracta X polyantha | apo    | 4    | 47.45 | -110.58 |
| 32  | 3      | retrofracta X polyantha | apo    | 4    | 47.45 | -110.58 |
| 119 | 3      | retrofracta X polyantha | apo    | 4    | 47.45 | -110.58 |
| 122 | 3      | retrofracta X polyantha | apo    | 4    | 47.45 | -110.58 |
| 143 | 3      | retrofracta X polyantha | apo    | 4    | 47.45 | -110.58 |
| 196 | 3      | retrofracta X polyantha | apo    | 4    | 47.45 | -110.58 |
| 215 | 3      | retrofracta X polyantha | apo    | 4    | 47.45 | -110.58 |
| 217 | 3      | retrofracta X polyantha | apo    | 4    | 47.45 | -110.58 |
| 218 | 3      | retrofracta X polyantha | apo    | 4    | 47.45 | -110.58 |
| 236 | 3      | retrofracta X polyantha | apo    | 4    | 47.45 | -110.58 |
| 309 | 3      | retrofracta X polyantha | apo    | 4    | 47.45 | -110.58 |
| 24  | 2      | polyantha               | apo    | 5    | 48.26 | -112.62 |
| 20  | 2      | polyantha               | apo    | 5    | 48.26 | -112.62 |
| 38  | 2      | polyantha               | apo    | 5    | 48.26 | -112.62 |
| 106 | 2      | polyantha               | apo    | 5    | 48.26 | -112.62 |
| 107 | 2      | polyantha               | apo    | 5    | 48.26 | -112.62 |
| 111 | 2      | polyantha               | apo    | 5    | 48.26 | -112.62 |
| 112 | 2      | polyantha               | apo    | 5    | 48.26 | -112.62 |
| 121 | 2      | polyantha               | apo    | 5    | 48.26 | -112.62 |
| 252 | 2      | polyantha               | apo    | 5    | 48.26 | -112.62 |
| 256 | 2      | polyantha               | apo    | 5    | 48.26 | -112.62 |
| 257 | 2      | polyantha               | apo    | 5    | 48.26 | -112.62 |
| 258 | 2      | polyantha               | apo    | 5    | 48.26 | -112.62 |
| 259 | 2      | polyantha               | apo    | 5    | 48.26 | -112.62 |
| 260 | 2      | polyantha               | apo    | 5    | 48.26 | -112.62 |
| 264 | 2      | polyantha               | apo    | 5    | 48.26 | -112.62 |
| 265 | 2      | polyantha               | apo    | 5    | 48.26 | -112.62 |
| 28  | 2      | polyantha               | apo    | 5    | 48.26 | -112.62 |
| 42  | 2      | polyantha               | apo    | 5    | 48.26 | -112.62 |
| 108 | 2      | polyantha               | apo    | 5    | 48.26 | -112.62 |
| 112 | 2      | polyantha               | apo    | 5    | 48.26 | -112.62 |
| 27  | 2      | retrofracta             | apo    | 5    | 48.26 | -112.62 |
| 37  | 2      | retrofracta             | apo    | 5    | 48.26 | -112.62 |
| 262 | 2      | retrofracta             | apo    | 5    | 48.26 | -112.62 |
| 263 | 2      | retrofracta             | apo    | 5    | 48.26 | -112.62 |
| 266 | 2      | retrofracta             | apo    | 5    | 48.26 | -112.62 |
| 267 | 2      | retrofracta             | apo    | 5    | 48.26 | -112.62 |
| 322 | 2      | retrofracta             | apo    | 5    | 48.26 | -112.62 |
| 115 | 2      | retrofracta             | apo    | 5    | 48.26 | -112.62 |
| 300 | 2      | retrofracta             | apo    | 5    | 48.26 | -112.62 |
| 36  | 2      | polyantha               | apo    | 6    | 46.21 | -113.17 |
| 40  | 2      | polyantha               | apo    | 6    | 46.21 | -113.17 |
| 206 | 2      | polyantha               | apo    | 6    | 46.21 | -113.17 |
| 207 | 2      | polyantha               | apo    | 6    | 46.21 | -113.17 |
| 210 | 2      | polyantha               | apo    | 6    | 46.21 | -113.17 |
| 214 | 2      | polyantha               | apo    | 6    | 46.21 | -113.17 |
| 272 | 2      | polyantha               | apo    | 6    | 46.21 | -113.17 |
| 34  | 2      | polyantha               | apo    | 6    | 46.21 | -113.17 |
| 205 | 2      | polyantha               | apo    | 6    | 46.21 | -113.17 |
| 209 | 2      | polyantha               | sex    | 6    | 46.21 | -113.17 |
| 218 | 2      | polyantha               | sex    | 6    | 46.21 | -113.17 |
| 203 | 2      | polyantha               | sex    | 6    | 46.21 | -113.17 |
| 213 | 2      | polyantha               | sex    | 6    | 46.21 | -113.17 |
| 15  | 2      | polyantha               | sex    | 7    | 47.02 | -113.35 |
| 82  | 2      | polyantha               | sex    | 7    | 47.02 | -113.35 |
| 93  | 2      | polyantha               | sex    | 7    | 47.02 | -113.35 |
| 99  | 2      | polyantha               | sex    | 7    | 47.02 | -113.35 |
| 100 | 2      | polyantha               | sex    | 7    | 47.02 | -113.35 |
| 101 | 2      | polyantha               | sex    | 7    | 47.02 | -113.35 |
| 194 | 2      | polyantha               | sex    | 7    | 47.02 | -113.35 |
| 84  | 2      | polyantha               | apo    | 7    | 47.02 | -113.35 |
| 95  | 2      | polyantha               | apo    | 7    | 47.02 | -113.35 |
| 102 | 2      | polyantha               | apo    | 7    | 47.02 | -113.35 |
| 104 | 2      | polyantha               | apo    | 7    | 47.02 | -113.35 |
| 190 | 2      | polyantha               | apo    | 7    | 47.02 | -113.35 |
| 192 | 2      | polyantha               | apo    | 7    | 47.02 | -113.35 |
| 87  | 2      | polyantha               | sex    | 7    | 47.02 | -113.35 |
| 88  | 2      | polyantha               | sex    | 7    | 47.02 | -113.35 |
| 89  | 2      | polyantha               | sex    | 7    | 47.02 | -113.35 |
| 92  | 2      | polyantha               | sex    | 7    | 47.02 | -113.35 |
| 94  | 2      | polyantha               | sex    | 7    | 47.02 | -113.35 |
| 97  | 2      | polyantha               | sex    | 7    | 47.02 | -113.35 |
| 137 | 2      | polyantha               | sex    | 8    | 45.55 | -113.82 |
| 268 | 2      | polyantha               | sex    | 8    | 45.55 | -113.82 |
| 269 | 2      | polyantha               | sex    | 8    | 45.55 | -113.82 |
| 429 | 3      | stricta X pendulocarpa  | apo    | 9    | 45.48 | -114.37 |
| 449 | 3      | stricta X pendulocarpa  | apo    | 9    | 45.48 | -114.37 |
| 132 | 3      | stricta X pendulocarpa  | apo    | 10   | 45.67 | -112.88 |
| 303 | 3      | stricta X pendulocarpa  | apo    | 10   | 45.67 | -112.88 |
| 301 | 3      | stricta X pendulocarpa  | apo    | 12   | 45.37 | -114.55 |
| 441 | 3      | stricta X pendulocarpa  | apo    | 12   | 45.37 | -114.55 |
| 452 | 3      | stricta X pendulocarpa  | apo    | 12   | 45.37 | -114.55 |
| 453 | 3      | stricta X pendulocarpa  | apo    | 12   | 45.37 | -114.55 |
| 455 | 3      | stricta X pendulocarpa  | apo    | 12   | 45.37 | -114.55 |
| 457 | 3      | stricta X pendulocarpa  | apo    | 12   | 45.37 | -114.55 |
| 249 | 2      | retrofracta             | apo    | 13   | 45.77 | -112.86 |
| 250 | 2      | retrofracta             | sex    | 13   | 45.77 | -112.86 |
| 271 | 2      | retrofracta             | sex    | 13   | 45.77 | -112.86 |
| 211 | 2      | retrofracta             | sex    | 13   | 45.77 | -112.86 |
| 212 | 2      | retrofracta             | sex    | 13   | 45.77 | -112.86 |
| 305 | 2      | stricta                 | sex    | 14   | 45.53 | -113.99 |
| 41  | 2      | pendulocarpa            | sex    | 15   | 46.87 | -113.99 |
| 43  | 2      | pendulocarpa            | sex    | 15   | 46.87 | -113.99 |
| 176 | 2      | pendulocarpa            | sex    | 15   | 46.87 | -113.99 |
| 177 | 2      | pendulocarpa            | sex    | 15   | 46.87 | -113.99 |
| 180 | 2      | pendulocarpa            | sex    | 15   | 46.87 | -113.99 |
| 183 | 2      | pendulocarpa            | sex    | 15   | 46.87 | -113.99 |
| 185 | 2      | pendulocarpa            | sex    | 15   | 46.87 | -113.99 |
| 25  | 2      | pendulocarpa            | sex    | 15   | 46.87 | -113.99 |
| 26  | 2      | pendulocarpa            | sex    | 15   | 46.87 | -113.99 |
| 177 | 2      | pendulocarpa            | sex    | 15   | 46.87 | -113.99 |
| 182 | 2      | pendulocarpa            | sex    | 15   | 46.87 | -113.99 |
| 187 | 2      | pendulocarpa            | sex    | 15   | 46.87 | -113.99 |
| 142 | 2      | pendulocarpa            | sex    | 16   | 47.08 | -112.37 |
| 135 | 2      | pendulocarpa            | sex    | 16   | 47.08 | -112.37 |
| 124 | 2      | stricta                 | sex    | 16   | 47.08 | -112.91 |
| 128 | 2      | stricta                 | sex    | 16   | 47.08 | -112.91 |
| 134 | 2      | stricta                 | sex    | 16   | 47.08 | -112.91 |
| 130 | 3      | stricta X retrofracta   | apo    | 19   | 46.12 | -112.91 |
| 238 | 2      | pendulocarpa            | apo    | 20   | 44.51 | -114.23 |
| 149 | 2      | pendulocarpa            | apo    | 20   | 44.51 | -114.23 |
| 245 | 2      | pendulocarpa            | apo    | 20   | 44.51 | -114.23 |
| 246 | 2      | pendulocarpa            | apo    | 20   | 44.51 | -114.23 |
| 247 | 2      | pendulocarpa            | apo    | 20   | 44.51 | -114.23 |
| 444 | 2      | stricta                 | apo    | 20   | 44.51 | -114.23 |
| 447 | 2      | stricta                 | apo    | 20   | 44.51 | -114.23 |
| 17  | 3      | stricta X pendulocarpa  | apo    | 20   | 44.51 | -114.23 |
| 147 | 3      | stricta X pendulocarpa  | apo    | 20   | 44.51 | -114.23 |
| 148 | 3      | stricta X pendulocarpa  | apo    | 20   | 44.51 | -114.23 |
| 189 | 3      | stricta X pendulocarpa  | apo    | 20   | 44.51 | -114.23 |
| 234 | 3      | stricta X pendulocarpa  | apo    | 20   | 44.51 | -114.23 |
| 240 | 3      | stricta X pendulocarpa  | apo    | 20   | 44.51 | -114.23 |
| 241 | 3      | stricta X pendulocarpa  | apo    | 20   | 44.51 | -114.23 |
| 243 | 3      | stricta X pendulocarpa  | apo    | 20   | 44.51 | -114.23 |
| 76  | 2      | retrofracta             | sex    | 21   | 46.55 | -113.65 |
| 65  | 2      | retrofracta             | sex    | 21   | 46.55 | -113.65 |
| 67  | 2      | retrofracta             | sex    | 21   | 46.55 | -113.65 |
| 70  | 2      | retrofracta             | sex    | 21   | 46.55 | -113.65 |
| 71  | 2      | retrofracta             | sex    | 21   | 46.55 | -113.65 |
| 73  | 2      | retrofracta             | sex    | 21   | 46.55 | -113.65 |
| 74  | 2      | retrofracta             | sex    | 21   | 46.55 | -113.65 |
| 78  | 2      | retrofracta             | sex    | 21   | 46.55 | -113.65 |
| 66  | 2      | retrofracta             | apo    | 21   | 46.55 | -113.65 |
| 276 | 3      | stricta X retrofracta   | apo    | 21   | 46.55 | -113.65 |
| 304 | 3      | stricta X pendulocarpa  | apo    | 22   | 44.22 | -113.72 |
| 230 | 2      | stricta                 | sex    | 23   | 44.13 | -113.82 |
| 171 | 2      | stricta                 | sex    | 24   | 45.81 | -112.99 |
| 231 | 2      | stricta                 | sex    | 24   | 45.81 | -112.99 |
| 175 | 2      | stricta                 | sex    | 25   | 46.07 | -113.27 |
| 47  | 2      | polyantha               | sex    | 26   | 45.28 | -117.40 |
| 51  | 2      | polyantha               | sex    | 26   | 45.28 | -117.40 |
| 48  | 2      | polyantha               | sex    | 26   | 45.28 | -117.40 |
| 52  | 2      | polyantha               | sex    | 26   | 45.28 | -117.40 |
| 54  | 2      | polyantha               | sex    | 26   | 45.28 | -117.40 |
| 55  | 2      | polyantha               | sex    | 26   | 45.28 | -117.40 |
| 57  | 2      | polyantha               | sex    | 26   | 45.28 | -117.40 |
| 59  | 2      | polyantha               | sex    | 26   | 45.28 | -117.40 |
| 60  | 2      | polyantha               | sex    | 26   | 45.28 | -117.40 |
| 70  | 2      | polyantha               | sex    | 26   | 45.28 | -117.40 |
| 199 | 2      | polyantha               | sex    | 26   | 45.28 | -117.40 |
| 49  | 2      | polyantha               | sex    | 26   | 45.28 | -117.40 |
| 50  | 2      | polyantha               | sex    | 26   | 45.28 | -117.40 |
| 56  | 2      | polyantha               | sex    | 26   | 45.28 | -117.40 |
| 61  | 2      | polyantha               | sex    | 26   | 45.28 | -117.40 |
| 62  | 2      | polyantha               | sex    | 26   | 45.28 | -117.40 |
| 63  | 2      | polyantha               | sex    | 26   | 45.28 | -117.40 |
| 193 | 2      | polyantha               | sex    | 26   | 45.28 | -117.40 |
| 198 | 2      | polyantha               | sex    | 26   | 45.28 | -117.40 |
| 200 | 2      | polyantha               | sex    | 26   | 45.28 | -117.40 |
| 202 | 2      | polyantha               | sex    | 26   | 45.28 | -117.40 |
| 203 | 2      | polyantha               | sex    | 26   | 45.28 | -117.40 |
| 284 | 3      | stricta X retrofracta   | apo    | 27   | 40.08 | -120.61 |
| 284 | 3      | stricta X retrofracta   | apo    | 28   | 38.95 | -119.95 |
| 289 | 3      | retrofracta X polyantha | apo    | 29   | 38.79 | -120.98 |
| 290 | 3      | retrofracta X polyantha | apo    | 30   | 38.52 | -119.60 |
| 279 | 2      | stricta                 | sex    | 32   | 36.43 | -118.23 |
| 280 | 2      | stricta                 | sex    | 32   | 36.43 | -118.23 |
| 291 | 3      | stricta X retrofracta   | apo    | 32   | 36.43 | -118.23 |
| 286 | 3      | stricta X retrofracta   | apo    | 33   | 38.83 | -120.03 |
| 293 | 2      | stricta                 | sex    | 35   | 37.60 | -112.82 |
| 292 | 2      | stricta                 |        |      |       |         |
